# Supplementary material for: A New Integrated Approach to Groundwater Potential–Vulnerability Mapping Using AHP and DRASTIC
Source: Research Square preprint supplement (doi:10.21203/rs.3.rs-8422346/v1), 2026-02-09
Supplement: Supplementary file 1 [file 2c8e7ff51ab9eafe6e818791.docx]

**Table 4.** Classification of groundwater potential and vulnerability zones within the study area

| **No.** | **Potential Class** | **Area Coverage (%)** | **Vulnerability Class** | **Area Coverage (%)** |
| --- | --- | --- | --- | --- |
| 1 | High | 49.24 | High | 20.65 |
| 2 | Moderate | 39.22 | Moderate | 36.15 |
| 3 | Low | 11.53 | Low | 43.18 |
