# Supplementary material for: A New Integrated Approach to Groundwater Potential–Vulnerability Mapping Using AHP and DRASTIC
Source: Research Square preprint supplement (doi:10.21203/rs.3.rs-8422346/v1), 2026-02-09
Supplement: Supplementary file 2 [file 729170e43ff0bde604bea971.docx]

| **No.** | **Layer / Parameter** | **Data Source(s)** |
| --- | --- | --- |
| **Groundwater Potential Mapping (GWPM)** | | |
| **1** | Rainfall | Meteorological station records |
| **2** | Hydrogeological Units | *GD Sulaimani & relevant published literature |
| **3** | Land Use/Land Cover (LULC) | Landsat satellite imagery (USGS Earth Explorer) |
| **4** | Slope | SRTM DEM from USGS Earth Explorer |
| **5** | Soil Type | FAO (2001) & Berding (2001) |
| **6** | Lineament Density | DEM and Landsat satellite imagery |
| **7** | Drainage Density | SRTM DEM from USGS Earth Explorer |
| **Groundwater Vulnerability Mapping (GWVM)** | | |
| **8** | Depth to Water Table (D) | Borehole data, GD Sulaimani |
| **9** | Net Recharge (R) | Meteorological stations & hydrogeological studies |
| **10** | Aquifer Media (A) | Geology & borehole data; GD Sulaimani; Iraq Geological Survey |
| **11** | Soil Media (S) | FAO (2001) & Berding (2003) |
| **12** | Topography (T) | Digital elevation data (DEM), USGS Earth Explorer |
| **13** | Vadose Zone (I) | Lithology; GD Sulaimani |
| **14** | Hydraulic Conductivity (C) | Well tests; GD Sulaimani & published literature |
| **Validation** | | |
| **15** | Well Yield | GD Sulaimani & Field Surveys |
| **16** | Nitrate (NO₃⁻) Concentrations | Groundwater sampling |

**Table 1.** Data sources and layers for groundwater potential and vulnerability mapping

*GD Sulaimani: Groundwater Directorate of 40.
