# Supplementary material for: A New Integrated Approach to Groundwater Potential–Vulnerability Mapping Using AHP and DRASTIC
Source: Research Square preprint supplement (doi:10.21203/rs.3.rs-8422346/v1), 2026-02-09
Supplement: Supplementary file 3 [file c477fa75a1a5843367524884.docx]

**Table 2:** AHP-based criteria, rankings, and weights

| No. | Criteria | Classes | Rank | Class Weight (%) | Factor Weight (%) |
| --- | --- | --- | --- | --- | --- |
| 1. | Rainfall (mm/year) | >700 | 5 | 50 | 22 |
| 650.01–700 | 4 | 40 |
| 600.01–650.0 | 3 | 30 |
| 550.01–600.0 | 2 | 20 |
| ≤550 | 1 | 10 |
| 2. | Hydrogeological Unit | Karstic Aquifer | 5 | 50 | 20 |
| Karstic Fissured Aquifer | 4 | 40 |
| Intergranular Aquifer | 3 | 30 |
| Aquitard | 1 | 10 |
| 3. | Lineament Density (km/km²) | >2.0 | 5 | 50 | 16 |
| 1.501–2.0 | 4 | 40 |
| 1.01–1.50 | 3 | 30 |
| 0.501–1.0 | 2 | 20 |
| ≤ 0.5 | 1 | 10 |
| 4. | Slope (degrees) | <10.0 | 5 | 50 | 9 |
| 10.01–25.0 | 4 | 40 |
| 25.01–40.0 | 3 | 30 |
| 40.01–65.0 | 2 | 20 |
| >65 | 1 | 10 |
| 5. | Soil Type | Gravel/Absent (B2) | 5 | 50 | 11 |
| Silty Loam (C3) | 3 | 30 |
| Clay (C2.1) | 1 | 10 |
| 6. | Land Use / Land Cover (LULC) | Vegetation | 5 | 50 | 14 |
| Agriculture | 4 | 40 |
| Water | 3 | 30 |
| Bareland | 2 | 20 |
| Settlements | 1 | 10 |
| 7. | Drainage Density (km/km²) | <0.45 | 5 | 50 | 8 |
| 0.451–0.90 | 4 | 40 |
| 0.901–1.90 | 3 | 30 |
| 1.901–2.0 | 2 | 20 |
| >2.0 | 1 | 10 |
