# Supplementary material for: A New Integrated Approach to Groundwater Potential–Vulnerability Mapping Using AHP and DRASTIC
Source: Research Square preprint supplement (doi:10.21203/rs.3.rs-8422346/v1), 2026-02-09
Supplement: Supplementary file 4 [file e4e5573a76bf746f004c83cc.docx]

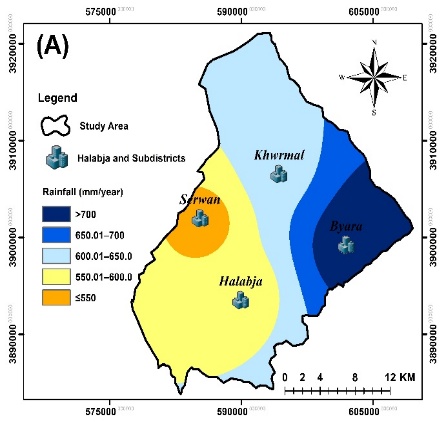

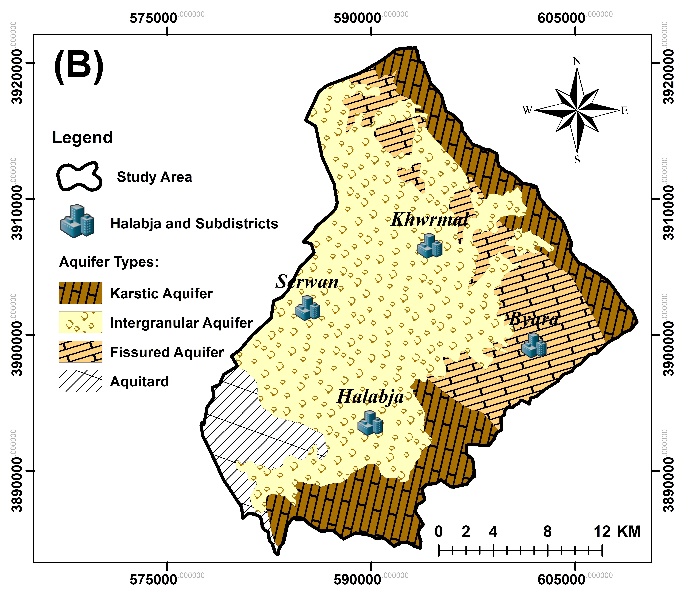

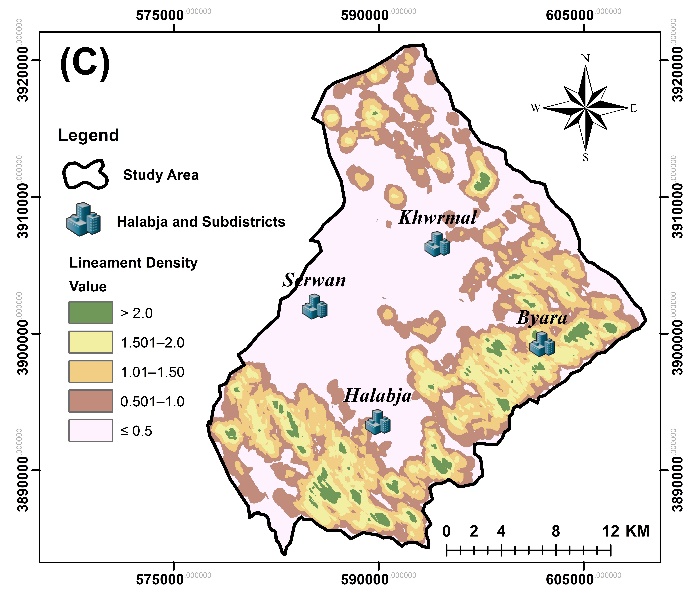

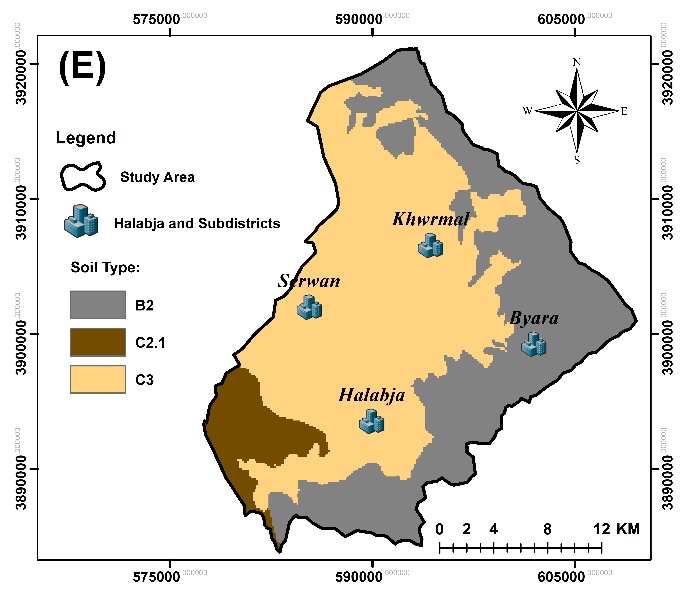

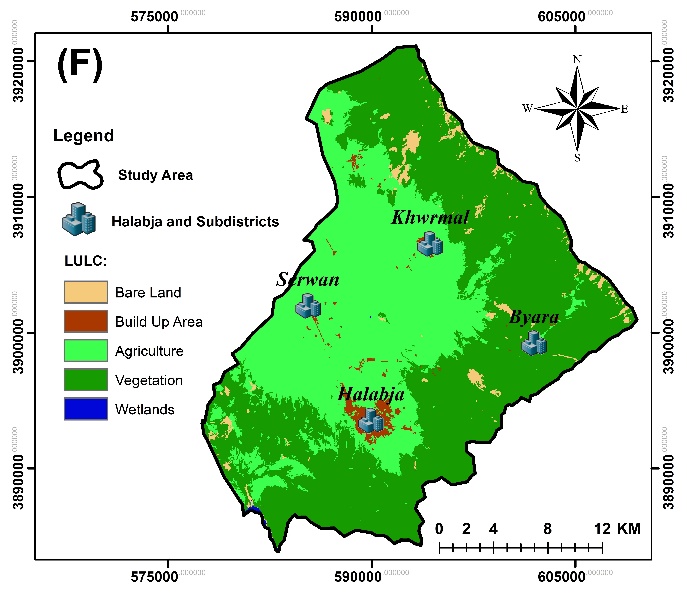

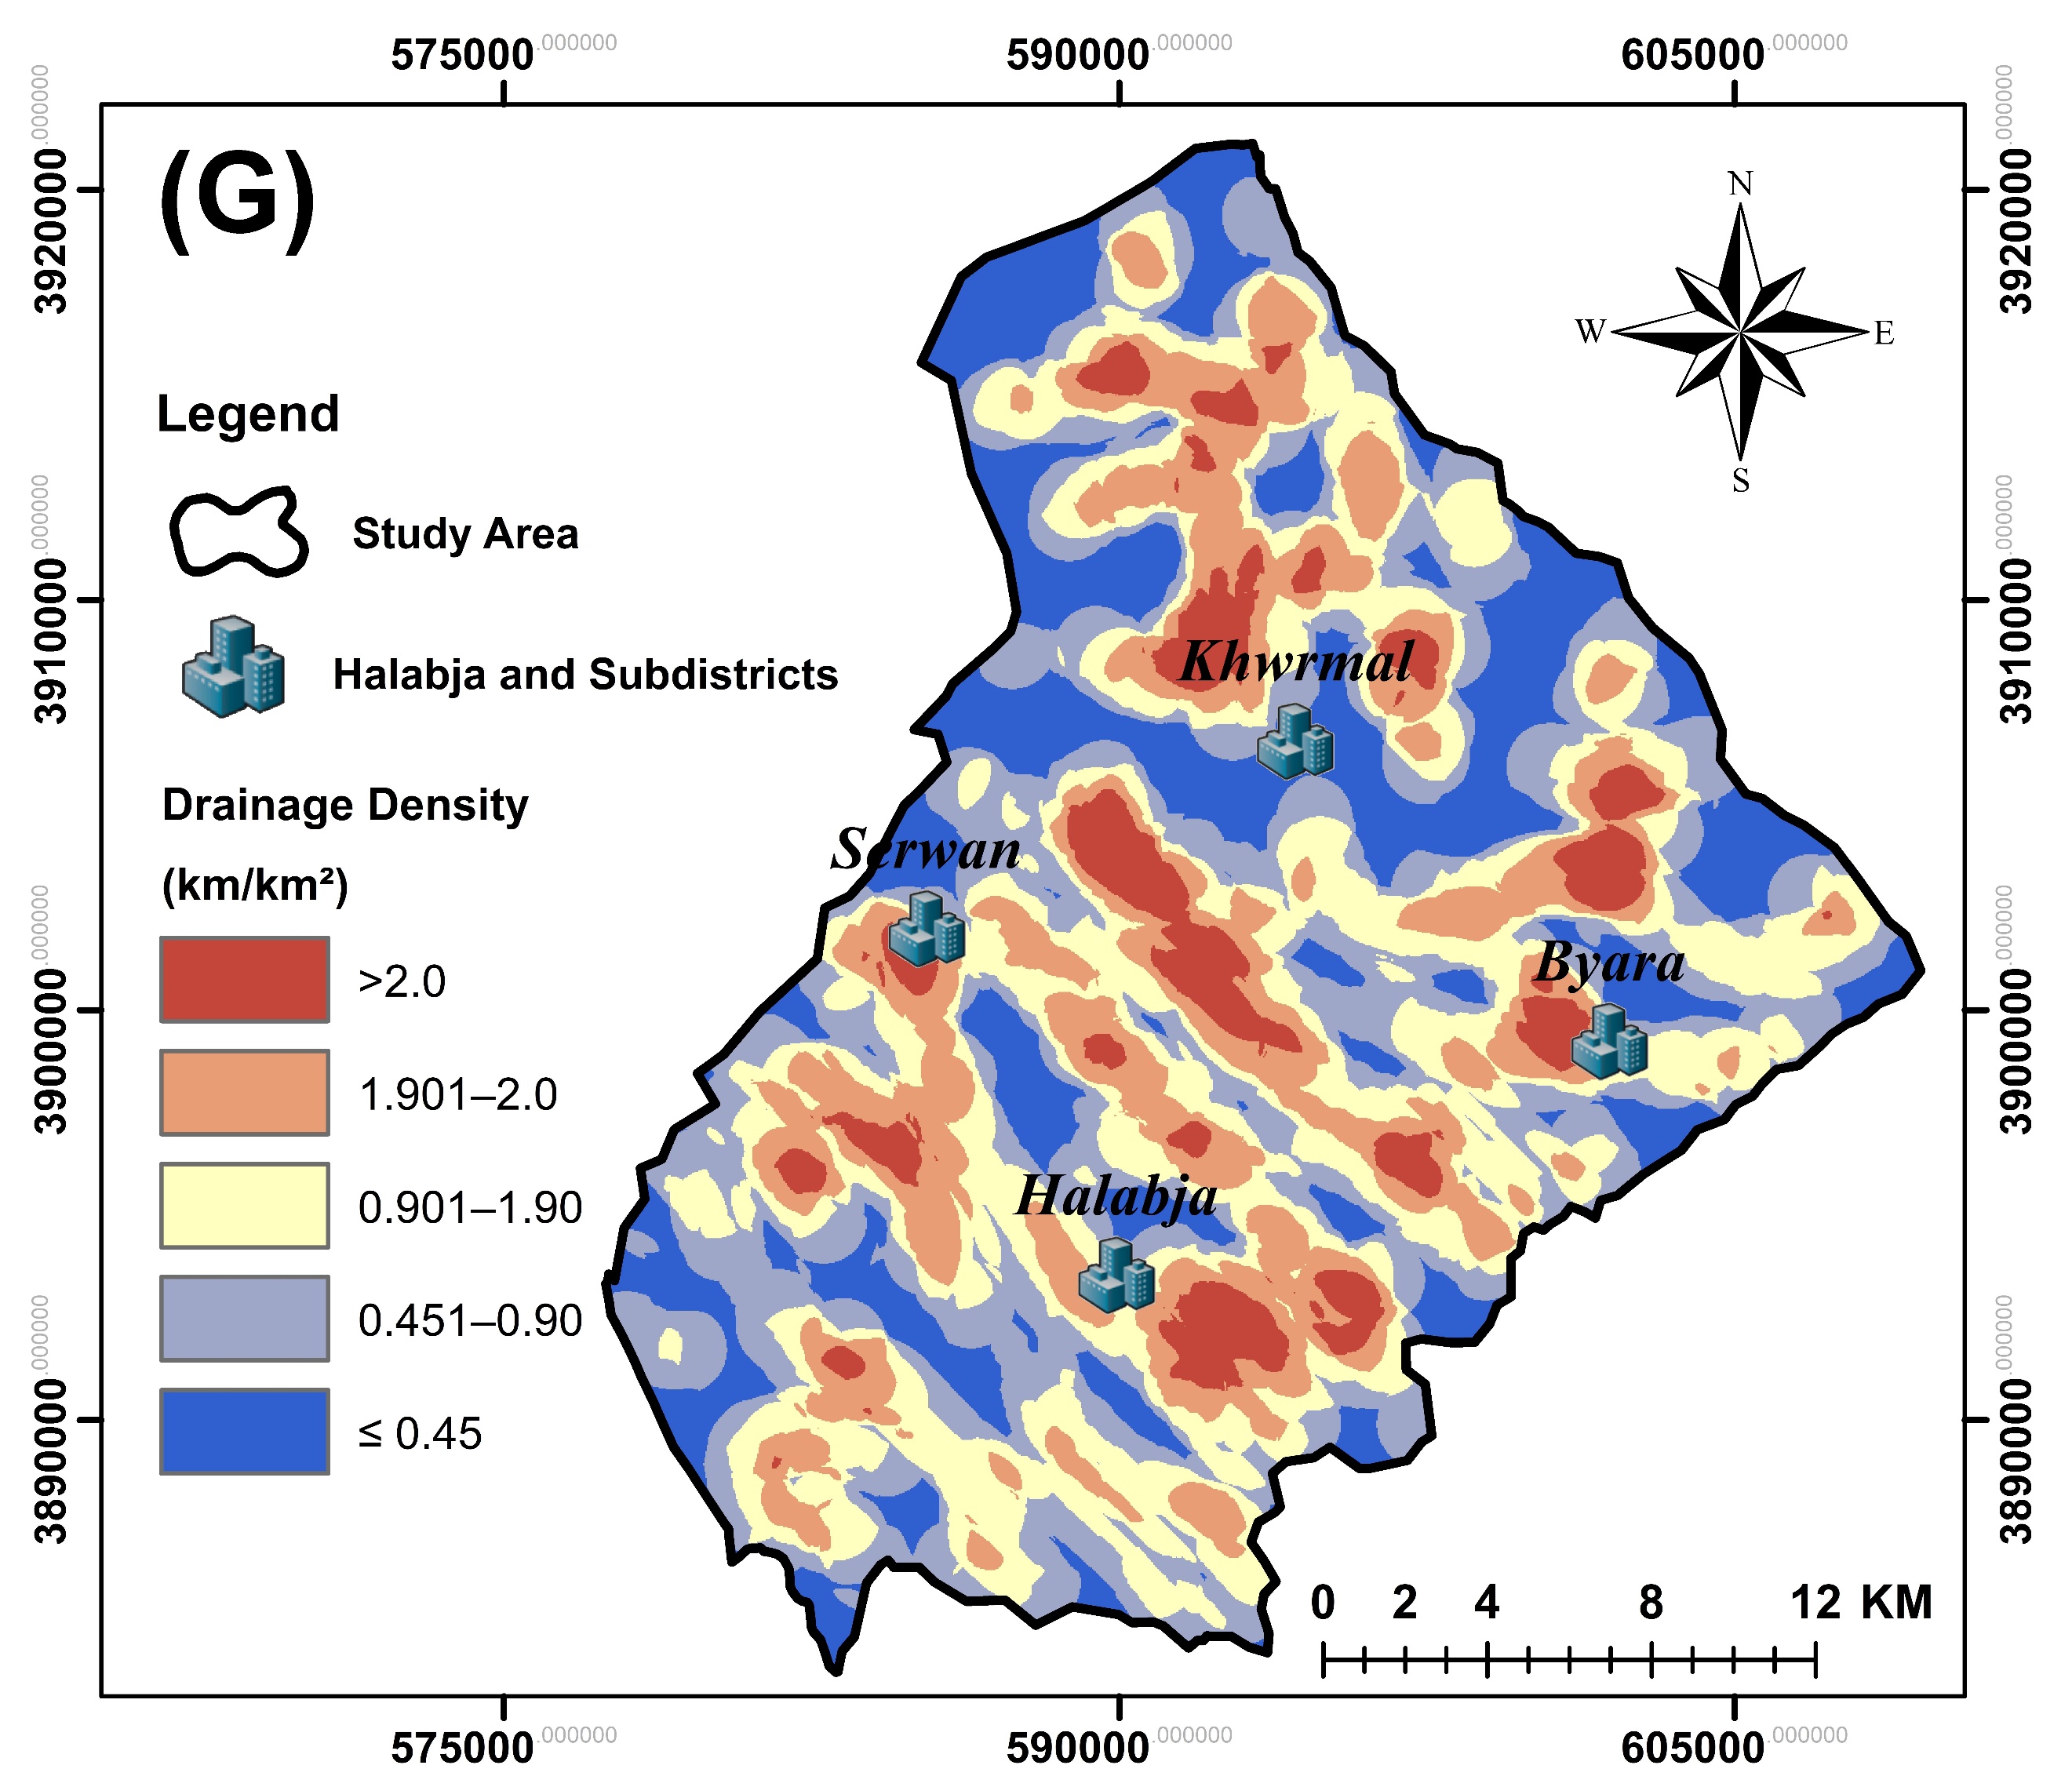

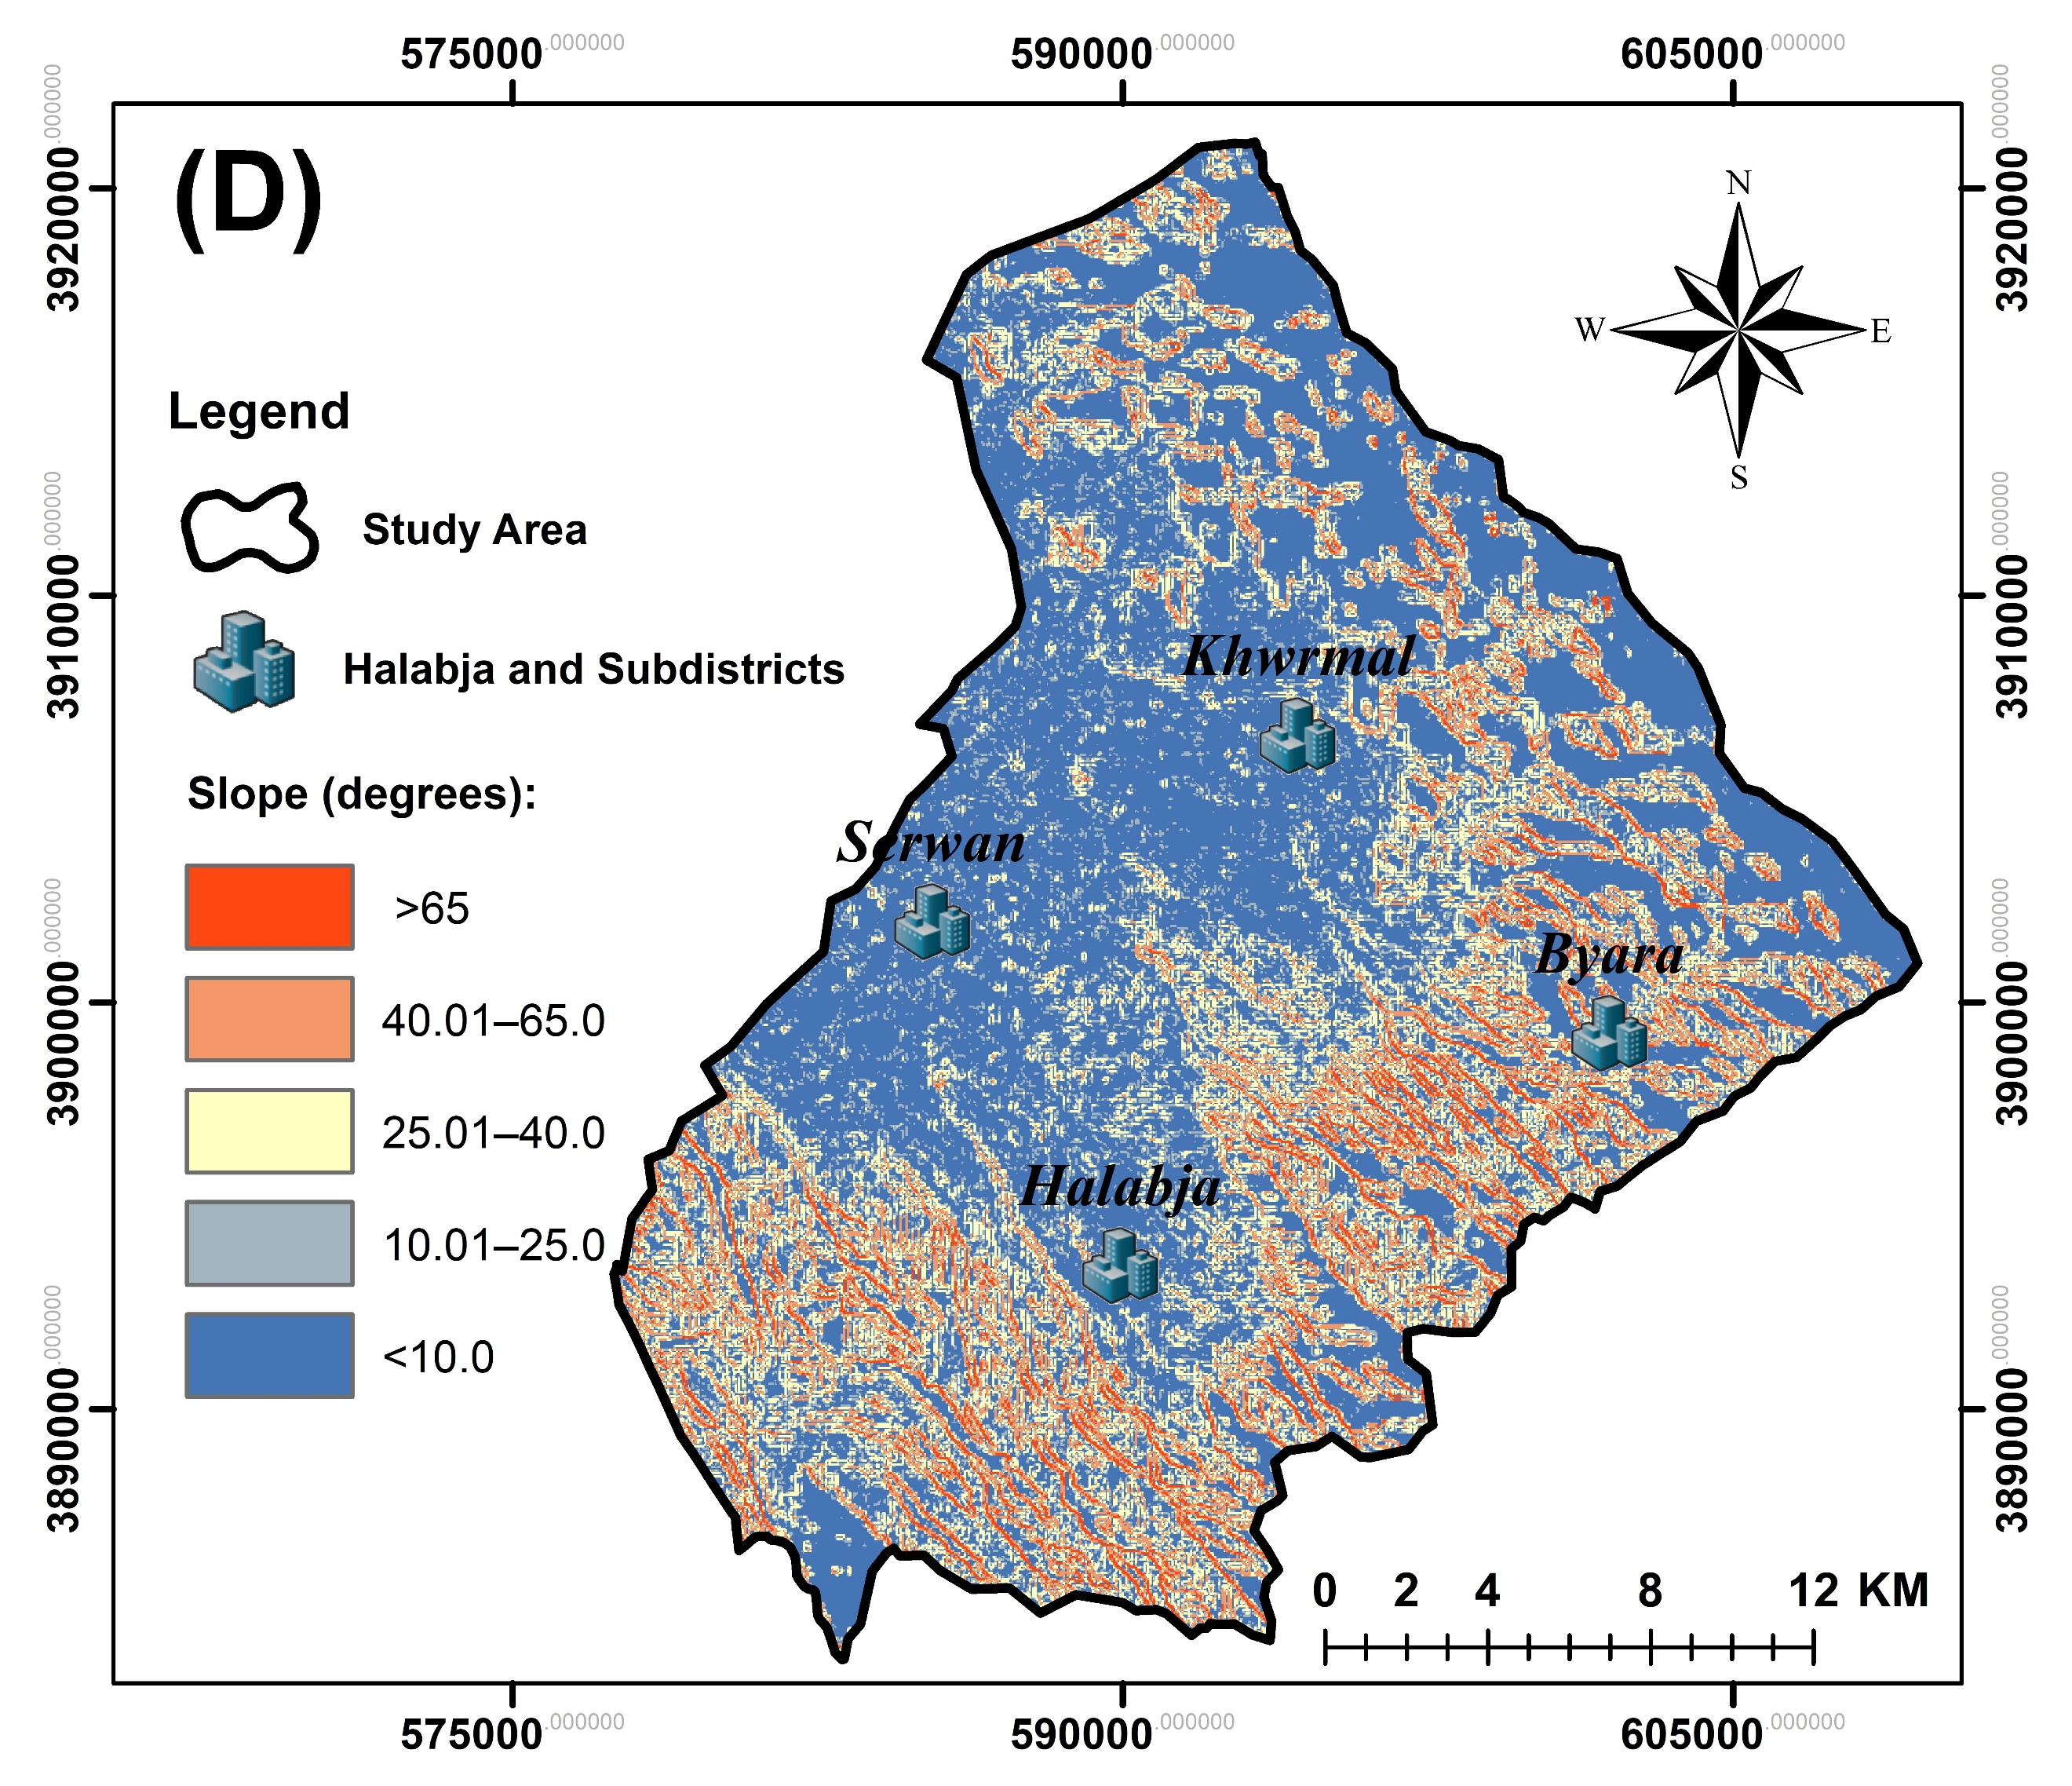


**Figure 3.** Input layers applied for developing the groundwater potential map in the study area: **(a)** Rainfall distribution, **(b)** Hydrogeological units, **(c)** Lineament density **(d)** Slope, **(e)** Soil cover, **(f)** Land use/land cover,and **(g)** Drainage density
